# Supplementary material for: Development and External Validation of the SANTANDER Score: A Primary Care Clinical Decision Tool for Cardiovascular Risk Stratification in Colombia
Source: Research Square preprint supplement (doi:10.21203/rs.3.rs-8674390/v1), 2026-01-29
Supplement: Supplementary file 1 [file 37bc7f656142025576b349c3.docx]

**SUPPLEMENTARY MATERIAL**

**Development and External Validation of the SANTANDER Score**

# Table S1. Correlation Matrix of Continuous Predictors

Pearson correlation coefficients for continuous variables in the derivation cohort (n=742). Values represent linear correlation strength; *p<0.01, **p<0.001.

| **Variable** | **Age** | **SBP** | **DBP** | **BMI** | **WC** | **Glucose** | **Chol** |
| --- | --- | --- | --- | --- | --- | --- | --- |
| Age | 1.00 | 0.34** | 0.18** | 0.09 | 0.12* | 0.27** | 0.15** |
| SBP | — | 1.00 | 0.67** | 0.31** | 0.29** | 0.22** | 0.19** |
| DBP | — | — | 1.00 | 0.28** | 0.26** | 0.16** | 0.12* |
| BMI | — | — | — | 1.00 | **0.82**** | 0.35** | 0.21** |
| WC | — | — | — | — | 1.00 | 0.39** | 0.18** |

*SBP, systolic blood pressure; DBP, diastolic blood pressure; BMI, body mass index; WC, waist circumference; Chol, total cholesterol. Highlighted cell shows high collinearity between BMI and WC (r=0.82), leading to exclusion of WC from final model (VIF=6.2).*

# Table S2. Assessment of Non-Linear Relationships Using Restricted Cubic Splines

Likelihood ratio tests comparing models with restricted cubic splines (4 knots) vs. linear terms for continuous predictors. Models tested in derivation cohort (n=742).

| **Variable** | **Linear AUC** | **Spline AUC** | **LR χ²** | **df** | **P-value** |
| --- | --- | --- | --- | --- | --- |
| Age | 0.760 | 0.762 | 4.2 | 2 | 0.12 |
| Systolic BP | 0.760 | 0.765 | **7.8** | 2 | **0.020*** |
| BMI | 0.760 | 0.761 | 2.9 | 2 | 0.23 |
| Fasting glucose | 0.760 | 0.764 | **11.4** | 2 | **0.003**** |
| Full spline model† | 0.760 | **0.769** | 18.3 | 8 | 0.019* |
| External validation‡ | **0.701** | **0.694** | — | — | 0.54 |

*LR, likelihood ratio; df, degrees of freedom; BP, blood pressure; BMI, body mass index. *p<0.05, **p<0.01. †Full model with splines for all continuous predictors. ‡Comparison of linear vs. spline models applied to validation cohort. Highlighted rows show statistically significant non-linearity; however, linear terms retained for parsimony given minimal AUC improvement and risk of overfitting (demonstrated by decreased performance in validation).*

# Table S3. Sensitivity Analyses: Model Performance Under Alternative Specifications

Performance of SANTANDER Score under different modeling approaches and variable exclusions. All models tested in derivation cohort (n=742) with external validation in independent cohort (n=255).

| **Model Specification** | **Derivation AUC** | **Validation AUC** | **Cal. Slope** | **Net Benefit†** |
| --- | --- | --- | --- | --- |
| **Full SANTANDER Score (reference)** | **0.760** | **0.701** | **0.98** | **0.124** |
| Without family history | 0.738 | 0.682 | 0.96 | 0.109 |
| Without smoking status | 0.741 | 0.689 | 0.97 | 0.112 |
| Without glucose (office-based) | 0.745 | 0.693 | 0.95 | 0.106 |
| Using waist circumference instead of BMI | 0.757 | 0.698 | 0.96 | 0.119 |
| Hard criteria only (no ≥2 risk factors)‡ | 0.742 | 0.688 | 0.99 | 0.102 |
| Age <60 years subgroup (n=278) | 0.731 | 0.678 | 0.94 | 0.091 |
| Age ≥60 years subgroup (n=464) | 0.715 | 0.701 | 0.97 | 0.138 |

*AUC, area under ROC curve; Cal., calibration; BMI, body mass index. †Net benefit at 20% threshold. ‡Outcome limited to established CVD, diabetes with complications, or CKD stage ≥3b only; excludes patients classified as high risk based on ≥2 major risk factors. Results demonstrate robust performance across alternative specifications, with maintained calibration and acceptable discrimination even when excluding self-reported variables (family history, smoking).*
